# Supplementary material
Source: PubMed Central journal article supplement (PMC3530219)
Supplement: supp_186.9.866_Booth_ODS.pdf [file supp_186.9.866_Booth_ODS.pdf]

# **Acellular Normal and Fibrotic Human Lung Matrices as a Culture System for**

## ***In Vitro* Investigation**

Adam J. Booth<sup>1</sup>, Ryan Hadley<sup>1</sup>, Ashley M. Cornett<sup>1</sup>, Alyssa A. Dreffs<sup>1</sup>, Stephanie A. Matthes<sup>1</sup>, Jessica L. Tsui<sup>1</sup>, Kevin Weiss<sup>1</sup>, Jeffrey C. Horowitz<sup>1</sup>, Vincent F. Fiore<sup>2</sup>, Thomas H. Barker<sup>2</sup>, Bethany B. Moore<sup>1</sup>, Fernando J. Martinez<sup>1</sup>, Laura E. Niklason<sup>3</sup>, and Eric S. White<sup>1</sup>

<sup>1</sup>Division of Pulmonary and Critical Care Medicine, Department of Internal Medicine, University of Michigan Medical School, Ann Arbor, MI, <sup>2</sup>Department of Biomedical Engineering, Georgia Institute of Technology, Atlanta, GA, <sup>3</sup>Departments of Anesthesia and Biomedical Engineering, Yale University, New Haven, CT

### **ONLINE SUPPLEMENTAL DATA**

## **SUPPLEMENTAL METHODS:**

*Decellularization of Lung Matrices:* Incubation times lasted, on average, 24 hours per step and involved instillation of solutions through both the pulmonary vasculature and the airways. In essence, lung samples were first agitated in sterile deionized, distilled water followed by incubation in 0.1% Triton X-100 to lyse cellular components. Samples were then washed 3 times with sterile PBS, followed by incubation with 2% sodium deoxycholate. Following three subsequent washes with sterile PBS, samples were incubated in 1M NaCl to lyse residual nuclei. After decanting NaCl, tissues were rinsed three times with sterile PBS and incubated with DNase (30 µg/ml) in 1.3mM MgSO<sub>4</sub> and 2mM CaCl<sub>2</sub>. The DNase solution was decanted and tissues were washed three times with sterile PBS. This protocol was repeated three times. Resulting samples were then sterilized with a solution containing 0.18% peracetic acid and 4.8% ethanol for 20 minutes and then washed three times with sterile PBS and stored at 4°C. Effluent following each incubation step was collected and frozen at -80°C until assayed by liquid chromatography-tandem mass spectrometry (see below).

*Atomic Force Microscopy:* Acellular tissue samples were dissected into strips of approximately 5 x 5 mm in length and width and 1000 µm in thickness, and were characterized using an MFP-3D-BIO atomic force microscope (AFM) (Asylum Research; Santa Barbara, CA). AFM nanoindentation tests were performed under fluid conditions (PBS, pH 7.4) using a 4.74 µm diameter spherical tipped-silicon nitride cantilever (Bruker, Camarillo, CA). Cantilever spring constants were measured prior to sample analysis using the thermal fluctuation method, with nominal values of 20-30 pN/nm (1). Two-dimensional force maps were taken in 30 x 30 µm grids, and force-indentation curves were individually analyzed using a Hertzian model for spherical tips, from which Young's modulus was obtained. The sample Poisson's ratio was assumed as 0.4 (2), and a power law of 1.5 was used to model tip geometry. All AFM

measurements were made using a cantilever deflection set point of 100 nm and a rate of indentation of 22.86  $\mu\text{m/s}$ .

*Sample Preparation and Mass Spectrometry:* Tissues were homogenized using a Bullet Blender (BB) in modified RIPA buffer (50mM Tris-HCl, pH 8.0, 50mM NaCl, 0.1% SDS, Roche complete protease inhibitor, Roche PhosStop phosphatase inhibitor) using 0.2mm Stainless Steel beads with a 1:1 tissue/bead ratio (w/w). The BB settings were: speed 8 for 3 minutes, speed 10 for 3 minutes, speed 10 for 3 minutes. Samples were incubated on ice between homogenization steps. The tissue homogenate was centrifuged at low speed to remove cell debris and beads, then supernatant removed and centrifuged at 13.5K for 15 minutes. Protein quantitation was performed by Qubit fluorometry. 20 $\mu\text{g}$  of extracted protein was separated on a 4-12% Bis Tris NuPage gel (Invitrogen) in the MOPS buffer system. Each gel lane was excised into forty equally sized segments and each was processed by in-gel digestion using a ProGest robot (DigiLab). The in-gel digestion protocol was as follows; samples were washed with 25mM ammonium bicarbonate followed by acetonitrile, reduced with 10mM dithiothreitol at 60°C followed by alkylation with 50mM iodoacetamide at room temperature. Samples were digested with sequencing grade trypsin (Promega) at 37°C for 4h. Reactions were quenched with formic acid and the supernatant was analyzed directly without further processing. Each gel digest was analyzed by nanoLC-MS/MS with a NanoAcquity HPLC system (Waters) interfaced to a LTQ Orbitrap Velos (ThermoFisher). Peptides were loaded on a trapping column and eluted over a 75 $\mu\text{m}$  analytical column at 300nL/min; both columns were packed with Jupiter Proteo resin (Phenomenex). Data were acquired using Collision Induced Dissociated (CID), the mass spectrometer was operated in data-dependent mode, with MS performed in the Orbitrap at 60,000 FWHM resolution, MS/MS was performed in the Velos. Product ion data were searched against the combined forward and reverse SwissProt human protein database using the Mascot

search engine v2.3.02 (Matrix Science) via Mascot Daemon v2.3.2. Mascot search result files (DAT) were parsed to the Scaffold program (Proteome Software) for visualization and validation. Identified phosphorylation sites were manually validated.

**Table E1.** Mass spectrometry analysis of effluent following each of the listed decellularization steps. Proteins identified in the effluent are listed by order of abundance (highest to lowest) with number of unique peptides and peptide abundance (the amount of each peptide) listed in the corresponding columns. Matrisome-associated proteins are sparsely present in the effluent.

| Identified Proteins                   | Number of Peptides |              |      |       | Peptide abundance |              |          |          |
|---------------------------------------|--------------------|--------------|------|-------|-------------------|--------------|----------|----------|
|                                       | Triton X           | Deoxycholate | NaCl | DNase | Triton X          | Deoxycholate | NaCl     | DNase    |
| Serum albumin                         | 293                | 224          | 163  | 166   | 4.23E-02          | 5.60E-02     | 3.84E-02 | 1.00E-01 |
| Filamin-A                             | 156                | 175          | 222  | 121   | 5.52E-03          | 1.07E-02     | 1.29E-02 | 1.80E-02 |
| Plectin                               | 82                 | 47           | 116  | 30    | 1.53E-03          | 1.52E-03     | 3.55E-03 | 2.35E-03 |
| Myosin-11                             | 68                 | 0            | 10   | 0     | 2.98E-03          | 0            | 7.17E-04 | 0        |
| Actin, cytoplasmic 2                  | 65                 | 34           | 34   | 21    | 1.54E-02          | 1.40E-02     | 1.32E-02 | 2.09E-02 |
| Vimentin                              | 63                 | 52           | 65   | 8     | 1.16E-02          | 1.66E-02     | 1.96E-02 | 6.19E-03 |
| Talin-1                               | 60                 | 43           | 38   | 13    | 2.21E-03          | 2.75E-03     | 2.29E-03 | 2.01E-03 |
| Actin, alpha cardiac muscle 1         | 55                 | 21           | 22   | 0     | 1.30E-02          | 8.62E-03     | 8.52E-03 | 0        |
| Serotransferrin                       | 51                 | 57           | 35   | 27    | 6.59E-03          | 1.28E-02     | 7.39E-03 | 1.46E-02 |
| Spectrin alpha chain, brain           | 50                 | 158          | 178  | 56    | 1.75E-03          | 9.56E-03     | 1.02E-02 | 8.20E-03 |
| Alpha-enolase                         | 43                 | 26           | 16   | 6     | 9.10E-03          | 9.54E-03     | 5.54E-03 | 5.33E-03 |
| Plastin-2                             | 41                 | 52           | 36   | 17    | 5.83E-03          | 1.28E-02     | 8.37E-03 | 1.01E-02 |
| Phosphoglycerate kinase 1             | 40                 | 10           | 16   | 22    | 8.85E-03          | 3.83E-03     | 5.78E-03 | 2.04E-02 |
| Moesin                                | 38                 | 17           | 41   | 25    | 5.56E-03          | 4.31E-03     | 9.81E-03 | 1.54E-02 |
| Early endosome antigen 1              | 37                 | 10           | 58   | 0     | 2.27E-03          | 1.06E-03     | 5.82E-03 | 0        |
| Myosin-9                              | 36                 | 5            | 36   | 11    | 1.58E-03          | 3.80E-04     | 2.58E-03 | 2.02E-03 |
| Desmoplakin                           | 36                 | 42           | 70   | 26    | 1.08E-03          | 2.18E-03     | 3.43E-03 | 3.27E-03 |
| Complement C3                         | 36                 | 10           | 27   | 12    | 1.92E-03          | 9.22E-04     | 2.35E-03 | 2.68E-03 |
| Alpha-1-antitrypsin                   | 36                 | 13           | 9    | 7     | 7.62E-03          | 4.77E-03     | 3.11E-03 | 6.22E-03 |
| Vinculin                              | 35                 | 56           | 35   | 48    | 2.81E-03          | 7.79E-03     | 4.59E-03 | 1.62E-02 |
| Hemoglobin subunit beta               | 34                 | 17           | 21   | 11    | 2.11E-02          | 1.83E-02     | 2.13E-02 | 2.87E-02 |
| Heat shock cognate 71 kDa protein     | 34                 | 7            | 9    | 8     | 4.77E-03          | 1.70E-03     | 2.06E-03 | 4.70E-03 |
| Alcohol dehydrogenase 1B              | 32                 | 12           | 15   | 2     | 7.96E-03          | 5.17E-03     | 6.10E-03 | 2.09E-03 |
| Transgelin                            | 30                 | 18           | 13   | 8     | 1.30E-02          | 1.35E-02     | 9.19E-03 | 1.45E-02 |
| Glutathione S-transferase P           | 30                 | 20           | 21   | 6     | 1.30E-02          | 1.50E-02     | 1.49E-02 | 1.09E-02 |
| Dihydropyrimidinase-related protein 2 | 27                 | 25           | 19   | 0     | 4.33E-03          | 6.95E-03     | 4.98E-03 | 0        |
| Haptoglobin                           | 27                 | 21           | 23   | 12    | 5.97E-03          | 8.05E-03     | 8.31E-03 | 1.11E-02 |
| Selenium-binding protein 1            | 26                 | 21           | 15   | 14    | 4.98E-03          | 6.96E-03     | 4.69E-03 | 1.12E-02 |
| Triosephosphate isomerase             | 26                 | 22           | 17   | 8     | 9.58E-03          | 1.41E-02     | 1.02E-02 | 1.24E-02 |
| Retinal dehydrogenase 1               | 26                 | 18           | 19   | 2     | 4.70E-03          | 5.64E-03     | 5.62E-03 | 1.52E-03 |
| Alpha-actinin-4                       | 26                 | 19           | 39   | 14    | 2.46E-03          | 3.12E-03     | 6.04E-03 | 5.57E-03 |
| Rab GDP dissociation inhibitor beta   | 25                 | 0            | 10   | 3     | 4.88E-03          | 0            | 3.19E-03 | 2.46E-03 |
| Leukotriene A-4 hydrolase             | 25                 | 11           | 16   | 8     | 3.61E-03          | 2.75E-03     | 3.77E-03 | 4.84E-03 |
| Heat shock 70 kDa protein 1A/1B       | 25                 | 6            | 6    | 7     | 3.55E-03          | 1.48E-03     | 1.39E-03 | 4.18E-03 |
| Junction plakoglobin                  | 24                 | 24           | 22   | 18    | 2.91E-03          | 5.05E-03     | 4.36E-03 | 9.17E-03 |
| Heat shock protein HSP 90-alpha       | 24                 | 6            | 16   | 7     | 2.81E-03          | 1.22E-03     | 3.06E-03 | 3.44E-03 |
| Vitamin D-binding protein             | 24                 | 15           | 15   | 6     | 4.51E-03          | 4.88E-03     | 4.60E-03 | 4.73E-03 |
| Liver carboxylesterase 1              | 23                 | 8            | 14   | 5     | 3.63E-03          | 2.19E-03     | 3.61E-03 | 3.31E-03 |
| Heat shock protein HSP 90-beta        | 23                 | 6            | 11   | 0     | 2.76E-03          | 1.25E-03     | 2.16E-03 | 0        |
| Hemoglobin subunit delta              | 23                 | 0            | 15   | 0     | 1.43E-02          | 0            | 1.52E-02 | 0        |
| Filaggrin-2                           | 22                 | 21           | 12   | 13    | 8.83E-04          | 1.46E-03     | 7.87E-04 | 2.19E-03 |
| Desmoglein-1                          | 22                 | 19           | 11   | 10    | 1.92E-03          | 2.87E-03     | 1.57E-03 | 3.66E-03 |
| Transgelin-2                          | 22                 | 11           | 12   | 6     | 9.95E-03          | 8.62E-03     | 8.87E-03 | 1.14E-02 |
| Alpha-actinin-1                       | 22                 | 0            | 32   | 0     | 2.13E-03          | 0            | 5.05E-03 | 0        |

| Identified Proteins                                                     | Number of Peptides |              |      |       | Peptide abundance |              |          |          |
|-------------------------------------------------------------------------|--------------------|--------------|------|-------|-------------------|--------------|----------|----------|
|                                                                         | Triton X           | Deoxycholate | NaCl | DNase | Triton X          | Deoxycholate | NaCl     | DNase    |
| Peroxiredoxin-1                                                         | 21                 | 11           | 12   | 10    | 9.50E-03          | 8.62E-03     | 8.87E-03 | 1.90E-02 |
| Hemoglobin subunit alpha                                                | 21                 | 15           | 14   | 11    | 1.39E-02          | 1.72E-02     | 1.52E-02 | 3.06E-02 |
| Tubulin alpha-1B chain                                                  | 21                 | 7            | 9    | 0     | 4.18E-03          | 2.41E-03     | 2.93E-03 | 0        |
| Phosphoglucomutase-1                                                    | 21                 | 0            | 4    | 0     | 3.43E-03          | 0            | 1.07E-03 | 0        |
| Hornerin                                                                | 20                 | 45           | 23   | 22    | 7.06E-04          | 2.75E-03     | 1.33E-03 | 3.26E-03 |
| Plastin-3                                                               | 20                 | 10           | 14   | 0     | 2.80E-03          | 2.43E-03     | 3.21E-03 | 0        |
| 78 kDa glucose-regulated protein                                        | 20                 | 10           | 10   | 5     | 2.76E-03          | 2.39E-03     | 2.26E-03 | 2.90E-03 |
| Rab GDP dissociation inhibitor alpha                                    | 19                 | 0            | 9    | 0     | 3.71E-03          | 0            | 2.87E-03 | 0        |
| Ribonuclease inhibitor                                                  | 19                 | 9            | 9    | 0     | 3.78E-03          | 3.10E-03     | 2.93E-03 | 0        |
| Protein disulfide-isomerase                                             | 19                 | 8            | 11   | 6     | 3.32E-03          | 2.42E-03     | 3.14E-03 | 4.40E-03 |
| Fibrinogen beta chain                                                   | 19                 | 9            | 8    | 2     | 3.38E-03          | 2.77E-03     | 2.32E-03 | 1.49E-03 |
| Filamin-B                                                               | 19                 | 38           | 29   | 22    | 6.80E-04          | 2.36E-03     | 1.70E-03 | 3.30E-03 |
| Tubulin beta-2C chain                                                   | 18                 | 0            | 0    | 0     | 3.58E-03          | 0            | 0        | 0        |
| 14-3-3 protein zeta/delta                                               | 18                 | 12           | 13   | 3     | 6.40E-03          | 7.39E-03     | 7.55E-03 | 4.47E-03 |
| 14-3-3 protein gamma                                                    | 18                 | 7            | 9    | 0     | 6.40E-03          | 4.31E-03     | 5.23E-03 | 0        |
| Profilin-1                                                              | 18                 | 9            | 6    | 3     | 1.19E-02          | 1.03E-02     | 6.51E-03 | 8.35E-03 |
| Tubulin beta chain                                                      | 18                 | 4            | 3    | 0     | 3.58E-03          | 1.38E-03     | 9.76E-04 | 0        |
| Protein DJ-1                                                            | 17                 | 4            | 4    | 3     | 8.46E-03          | 3.45E-03     | 3.25E-03 | 6.26E-03 |
| 14-3-3 protein beta/alpha                                               | 17                 | 8            | 10   | 0     | 6.04E-03          | 4.93E-03     | 5.81E-03 | 0        |
| Peptidyl-prolyl cis-trans isomerase A                                   | 16                 | 17           | 12   | 9     | 8.85E-03          | 1.63E-02     | 1.08E-02 | 2.09E-02 |
| Transaldolase                                                           | 16                 | 4            | 10   | 4     | 4.19E-03          | 1.82E-03     | 4.28E-03 | 4.40E-03 |
| Radixin                                                                 | 16                 | 21           | 15   | 0     | 2.31E-03          | 5.25E-03     | 3.54E-03 | 0        |
| Phosphoglycerate mutase 1                                               | 16                 | 0            | 0    | 0     | 5.49E-03          | 0            | 0        | 0        |
| Gelsolin                                                                | 16                 | 23           | 11   | 19    | 1.85E-03          | 4.61E-03     | 2.08E-03 | 9.23E-03 |
| L-lactate dehydrogenase A chain                                         | 16                 | 3            | 3    | 0     | 4.30E-03          | 1.40E-03     | 1.32E-03 | 0        |
| Chloride intracellular channel protein 1                                | 16                 | 0            | 0    | 0     | 5.90E-03          | 0            | 0        | 0        |
| Keratinocyte proline-rich protein Adenylyl cyclase-associated protein 1 | 15                 | 14           | 10   | 16    | 2.33E-03          | 3.77E-03     | 2.54E-03 | 1.04E-02 |
| 14-3-3 protein epsilon                                                  | 15                 | 10           | 11   | 3     | 5.15E-03          | 5.95E-03     | 6.17E-03 | 4.32E-03 |
| F-actin-capping protein subunit beta                                    | 15                 | 2            | 4    | 0     | 4.82E-03          | 1.11E-03     | 2.10E-03 | 0        |
| Carbonyl reductase [NADPH] 1                                            | 15                 | 0            | 0    | 0     | 4.98E-03          | 0            | 0        | 0        |
| Annexin A2                                                              | 15                 | 18           | 33   | 13    | 3.83E-03          | 7.96E-03     | 1.38E-02 | 1.39E-02 |
| Cathepsin D                                                             | 15                 | 8            | 10   | 0     | 3.32E-03          | 3.07E-03     | 3.61E-03 | 0        |
| L-lactate dehydrogenase B chain                                         | 15                 | 2            | 3    | 0     | 4.03E-03          | 9.32E-04     | 1.32E-03 | 0        |
| Glyceraldehyde-3-phosphate dehydrogenase                                | 15                 | 17           | 13   | 5     | 4.15E-03          | 8.14E-03     | 5.87E-03 | 5.80E-03 |
| Alpha-2-macroglobulin                                                   | 15                 | 8            | 16   | 14    | 9.16E-04          | 8.46E-04     | 1.60E-03 | 3.59E-03 |
| Carbonic anhydrase 1                                                    | 15                 | 12           | 8    | 4     | 5.15E-03          | 7.14E-03     | 4.49E-03 | 5.76E-03 |
| Fatty acid-binding protein, epidermal                                   | 14                 | 9            | 11   | 5     | 9.29E-03          | 1.03E-02     | 1.19E-02 | 1.39E-02 |
| Ras GTPase-activating-like protein IQGAP1                               | 14                 | 9            | 3    | 6     | 7.37E-04          | 8.21E-04     | 2.58E-04 | 1.33E-03 |
| Protein disulfide-isomerase A3                                          | 14                 | 3            | 7    | 9     | 2.44E-03          | 9.08E-04     | 2.00E-03 | 6.59E-03 |
| Cytosol aminopeptidase                                                  | 14                 | 0            | 3    | 0     | 2.49E-03          | 0            | 8.71E-04 | 0        |
| 14-3-3 protein theta                                                    | 14                 | 0            | 0    | 0     | 4.98E-03          | 0            | 0        | 0        |
| Ezrin                                                                   | 14                 | 0            | 0    | 0     | 2.02E-03          | 0            | 0        | 0        |
| Creatine kinase B-type                                                  | 14                 | 7            | 10   | 0     | 3.24E-03          | 2.81E-03     | 3.78E-03 | 0        |

| Identified Proteins                                   | Number of Peptides |              |      |       | Peptide abundance |              |          |          |
|-------------------------------------------------------|--------------------|--------------|------|-------|-------------------|--------------|----------|----------|
|                                                       | Triton X           | Deoxycholate | NaCl | DNase | Triton X          | Deoxycholate | NaCl     | DNase    |
| Annexin A5                                            | 14                 | 4            | 13   | 3     | 3.87E-03          | 1.92E-03     | 5.87E-03 | 3.48E-03 |
| Fibrinogen gamma chain                                | 14                 | 5            | 7    | 7     | 2.68E-03          | 1.66E-03     | 2.19E-03 | 5.62E-03 |
| Carbonic anhydrase 2                                  | 14                 | 5            | 7    | 2     | 4.80E-03          | 2.97E-03     | 3.93E-03 | 2.88E-03 |
| Clathrin heavy chain 1                                | 13                 | 0            | 2    | 0     | 6.74E-04          | 0            | 1.69E-04 | 0        |
| Histone H4                                            | 13                 | 6            | 5    | 0     | 1.18E-02          | 9.41E-03     | 7.39E-03 | 0        |
| 6-phosphogluconate dehydrogenase, decarboxylating     | 13                 | 0            | 0    | 0     | 2.44E-03          | 0            | 0        | 0        |
| Serpin B6                                             | 13                 | 3            | 6    | 5     | 3.01E-03          | 1.20E-03     | 2.27E-03 | 4.86E-03 |
| Leukocyte elastase inhibitor                          | 13                 | 9            | 10   | 0     | 3.01E-03          | 3.61E-03     | 3.78E-03 | 0        |
| Peroxiredoxin-6                                       | 13                 | 0            | 5    | 0     | 5.17E-03          | 0            | 3.25E-03 | 0        |
| Transketolase                                         | 13                 | 6            | 20   | 0     | 1.90E-03          | 1.52E-03     | 4.78E-03 | 0        |
| Tryptophanyl-tRNA synthetase, cytoplasmic             | 13                 | 0            | 13   | 0     | 2.44E-03          | 0            | 3.99E-03 | 0        |
| Heat shock protein beta-1                             | 13                 | 2            | 6    | 0     | 5.62E-03          | 1.50E-03     | 4.24E-03 | 0        |
| Lactotransferrin                                      | 13                 | 32           | 36   | 12    | 1.66E-03          | 7.07E-03     | 7.51E-03 | 6.42E-03 |
| LIM and cysteine-rich domains protein 1               | 12                 | 0            | 0    | 0     | 2.91E-03          | 0            | 0        | 0        |
| Microtubule-actin cross-linking factor 1, isoform 4   | 12                 | 2            | 3    | 0     | 1.78E-04          | 5.15E-05     | 7.28E-05 | 0        |
| Cytosolic non-specific dipeptidase                    | 12                 | 0            | 0    | 0     | 2.25E-03          | 0            | 0        | 0        |
| Dihydropyrimidinase-related protein 3                 | 12                 | 13           | 5    | 0     | 1.93E-03          | 3.62E-03     | 1.31E-03 | 0        |
| 14-3-3 protein eta                                    | 12                 | 0            | 0    | 0     | 4.26E-03          | 0            | 0        | 0        |
| Elongation factor 1-alpha 1                           | 12                 | 5            | 6    | 0     | 2.39E-03          | 1.72E-03     | 1.95E-03 | 0        |
| Phosphatidylethanolamine-binding protein 1            | 12                 | 7            | 5    | 3     | 5.69E-03          | 5.75E-03     | 3.87E-03 | 5.97E-03 |
| Tropomyosin alpha-1 chain                             | 12                 | 17           | 15   | 8     | 3.62E-03          | 8.88E-03     | 7.39E-03 | 1.01E-02 |
| Bifunctional aminoacyl-tRNA synthetase                | 12                 | 0            | 0    | 0     | 6.98E-04          | 0            | 0        | 0        |
| Aldehyde dehydrogenase, mitochondrial                 | 12                 | 14           | 19   | 2     | 2.13E-03          | 4.31E-03     | 5.52E-03 | 1.49E-03 |
| Prolow-density lipoprotein receptor-related protein 1 | 11                 | 10           | 6    | 6     | 2.17E-04          | 3.41E-04     | 1.93E-04 | 4.96E-04 |
| Rho GDP-dissociation inhibitor 1                      | 11                 | 0            | 2    | 0     | 4.76E-03          | 0            | 1.41E-03 | 0        |
| 4-trimethylaminobutyraldehyde dehydrogenase           | 11                 | 5            | 6    | 0     | 2.03E-03          | 1.60E-03     | 1.81E-03 | 0        |
| Malate dehydrogenase, cytoplasmic                     | 11                 | 8            | 9    | 2     | 3.04E-03          | 3.83E-03     | 4.07E-03 | 2.32E-03 |
| Glutathione S-transferase Mu 3                        | 11                 | 3            | 2    | 0     | 4.05E-03          | 1.92E-03     | 1.20E-03 | 0        |
| S-formylglutathione hydrolase                         | 11                 | 8            | 3    | 0     | 3.53E-03          | 4.45E-03     | 1.57E-03 | 0        |
| Tropomyosin beta chain                                | 11                 | 21           | 16   | 4     | 3.32E-03          | 1.10E-02     | 7.89E-03 | 5.06E-03 |
| Annexin A1                                            | 11                 | 8            | 14   | 0     | 2.81E-03          | 3.54E-03     | 5.84E-03 | 0        |
| Apolipoprotein A-I                                    | 11                 | 0            | 0    | 0     | 3.53E-03          | 0            | 0        | 0        |
| Ig gamma-1 chain C region                             | 11                 | 10           | 14   | 4     | 3.04E-03          | 4.79E-03     | 6.33E-03 | 4.64E-03 |
| Isocitrate dehydrogenase [NADP] cytoplasmic           | 11                 | 2            | 6    | 0     | 2.33E-03          | 7.34E-04     | 2.08E-03 | 0        |
| Histone H2B type 1-K                                  | 11                 | 3            | 4    | 0     | 7.82E-03          | 3.69E-03     | 4.65E-03 | 0        |
| Skin-specific protein 32                              | 10                 | 10           | 5    | 10    | 3.83E-03          | 6.63E-03     | 3.13E-03 | 1.61E-02 |
| Neuroblast differentiation-associated protein AHNAK   | 10                 | 51           | 0    | 0     | 1.58E-04          | 1.40E-03     | 0        | 0        |
| Alcohol dehydrogenase [NADP+]                         | 10                 | 7            | 7    | 0     | 2.69E-03          | 3.26E-03     | 3.08E-03 | 0        |
| Gamma-enolase                                         | 10                 | 0            | 0    | 0     | 2.12E-03          | 0            | 0        | 0        |
| von Willebrand factor                                 | 10                 | 0            | 0    | 0     | 3.22E-04          | 0            | 0        | 0        |

| Identified Proteins                                                  | Number of Peptides |              |      |       | Peptide abundance |              |          |          |
|----------------------------------------------------------------------|--------------------|--------------|------|-------|-------------------|--------------|----------|----------|
|                                                                      | Triton X           | Deoxycholate | NaCl | DNase | Triton X          | Deoxycholate | NaCl     | DNase    |
| Catalase                                                             | 10                 | 9            | 12   | 3     | 1.66E-03          | 2.59E-03     | 3.25E-03 | 2.09E-03 |
| Fibrinogen alpha chain                                               | 10                 | 4            | 6    | 0     | 1.05E-03          | 7.26E-04     | 1.03E-03 | 0        |
| Ig kappa chain C region                                              | 10                 | 8            | 13   | 0     | 8.29E-03          | 1.15E-02     | 1.76E-02 | 0        |
| Basement membrane-specific heparan sulfate proteoglycan core protein | 9                  | 30           | 114  | 54    | 1.91E-04          | 1.10E-03     | 3.95E-03 | 4.81E-03 |
| Histone H3.3                                                         | 9                  | 2            | 2    | 0     | 5.97E-03          | 2.30E-03     | 2.17E-03 | 0        |
| Tropomyosin alpha-4 chain                                            | 9                  | 17           | 19   | 0     | 3.09E-03          | 1.01E-02     | 1.07E-02 | 0        |
| Transforming protein RhoA                                            | 9                  | 0            | 0    | 0     | 4.07E-03          | 0            | 0        | 0        |
| Fatty acid synthase                                                  | 9                  | 0            | 3    | 0     | 3.28E-04          | 0            | 1.79E-04 | 0        |
| Malate dehydrogenase, mitochondrial                                  | 9                  | 13           | 15   | 3     | 2.49E-03          | 6.23E-03     | 6.78E-03 | 3.48E-03 |
| Peroxiredoxin-2                                                      | 9                  | 9            | 9    | 4     | 4.07E-03          | 7.05E-03     | 6.65E-03 | 7.59E-03 |
| 14-3-3 protein sigma                                                 | 9                  | 0            | 0    | 0     | 3.20E-03          | 0            | 0        | 0        |
| Peroxiredoxin-5, mitochondrial                                       | 9                  | 0            | 0    | 0     | 4.07E-03          | 0            | 0        | 0        |
| Histone H2A type 1                                                   | 9                  | 4            | 0    | 0     | 6.40E-03          | 4.93E-03     | 0        | 0        |
| Fructose-1,6-bisphosphatase 1                                        | 9                  | 2            | 11   | 0     | 2.42E-03          | 9.32E-04     | 4.84E-03 | 0        |
| Glucose-6-phosphate isomerase                                        | 9                  | 7            | 9    | 0     | 1.42E-03          | 1.92E-03     | 2.32E-03 | 0        |
| Ferritin heavy chain                                                 | 9                  | 8            | 5    | 9     | 4.26E-03          | 6.57E-03     | 3.87E-03 | 1.79E-02 |
| Ferritin light chain                                                 | 9                  | 10           | 7    | 10    | 4.48E-03          | 8.62E-03     | 5.69E-03 | 2.09E-02 |
| Serum amyloid P-component                                            | 9                  | 6            | 11   | 5     | 3.58E-03          | 4.14E-03     | 7.16E-03 | 8.35E-03 |
| Polymerase I and transcript release factor                           | 8                  | 8            | 0    | 0     | 1.85E-03          | 3.21E-03     | 0        | 0        |
| Late cornified envelope protein 1C                                   | 8                  | 8            | 0    | 0     | 6.63E-03          | 1.15E-02     | 0        | 0        |
| Myosin light chain kinase, smooth muscle                             | 8                  | 0            | 0    | 0     | 3.77E-04          | 0            | 0        | 0        |
| Nuclear mitotic apparatus protein 1                                  | 8                  | 0            | 5    | 0     | 3.34E-04          | 0            | 3.42E-04 | 0        |
| Spectrin beta chain, brain 1                                         | 8                  | 50           | 33   | 3     | 2.89E-04          | 3.14E-03     | 1.95E-03 | 4.56E-04 |
| Transitional endoplasmic reticulum ATPase                            | 8                  | 7            | 11   | 0     | 8.95E-04          | 1.36E-03     | 2.01E-03 | 0        |
| Elongation factor 1-gamma                                            | 8                  | 0            | 2    | 0     | 1.59E-03          | 0            | 6.51E-04 | 0        |
| Cofilin-1                                                            | 8                  | 0            | 2    | 0     | 4.19E-03          | 0            | 1.71E-03 | 0        |
| Desmin                                                               | 8                  | 15           | 15   | 0     | 1.47E-03          | 4.79E-03     | 4.52E-03 | 0        |
| Calpain-2 catalytic subunit                                          | 8                  | 0            | 3    | 0     | 9.95E-04          | 0            | 6.10E-04 | 0        |
| Endoplasmic reticulum chaperone 78 kDa                               | 8                  | 2            | 3    | 0     | 8.65E-04          | 3.75E-04     | 5.30E-04 | 0        |
| 60 kDa heat shock protein, mitochondrial                             | 8                  | 5            | 6    | 0     | 1.31E-03          | 1.41E-03     | 1.60E-03 | 0        |
| Cathepsin H                                                          | 8                  | 6            | 6    | 0     | 2.15E-03          | 2.80E-03     | 2.64E-03 | 0        |
| Calpain-1 catalytic subunit                                          | 8                  | 3            | 6    | 0     | 9.71E-04          | 6.31E-04     | 1.19E-03 | 0        |
| Tropomyosin alpha-3 chain                                            | 8                  | 12           | 13   | 0     | 2.41E-03          | 6.27E-03     | 6.41E-03 | 0        |
| Hemopexin                                                            | 8                  | 2            | 4    | 2     | 1.53E-03          | 6.63E-04     | 1.25E-03 | 1.61E-03 |
| Myoglobin                                                            | 8                  | 2            | 0    | 0     | 4.68E-03          | 2.03E-03     | 0        | 0        |
| Ig alpha-1 chain C region                                            | 8                  | 5            | 6    | 9     | 2.10E-03          | 2.27E-03     | 2.57E-03 | 9.89E-03 |
| Alpha-1-antichymotrypsin                                             | 8                  | 5            | 6    | 12    | 1.66E-03          | 1.80E-03     | 2.03E-03 | 1.04E-02 |
| Coagulation factor XIII A chain                                      | 8                  | 0            | 3    | 0     | 9.59E-04          | 0            | 5.88E-04 | 0        |
| 6-phosphogluconolactonase                                            | 8                  | 0            | 0    | 0     | 2.84E-03          | 0            | 0        | 0        |
| Proteasome activator complex subunit 2                               | 7                  | 0            | 0    | 0     | 2.58E-03          | 0            | 0        | 0        |
| Ras-related protein Rab-1B                                           | 7                  | 0            | 0    | 0     | 3.17E-03          | 0            | 0        | 0        |
| Importin subunit beta-1                                              | 7                  | 0            | 5    | 0     | 7.18E-04          | 0            | 8.38E-04 | 0        |
| Lactoylglutathione lyase                                             | 7                  | 6            | 2    | 0     | 3.32E-03          | 4.93E-03     | 1.55E-03 | 0        |



| Identified Proteins                                              | Number of Peptides |              |      |       | Peptide abundance |              |          |          |
|------------------------------------------------------------------|--------------------|--------------|------|-------|-------------------|--------------|----------|----------|
|                                                                  | Triton X           | Deoxycholate | NaCl | DNase | Triton X          | Deoxycholate | NaCl     | DNase    |
| Glutathione S-transferase omega-1                                | 7                  | 4            | 0    | 0     | 2.49E-03          | 2.46E-03     | 0        | 0        |
| Ras-related protein Rab-1A                                       | 7                  | 0            | 0    | 0     | 3.03E-03          | 0            | 0        | 0        |
| Serine/threonine-protein phosphatase PP1-beta catalytic subunit  | 7                  | 0            | 0    | 0     | 1.88E-03          | 0            | 0        | 0        |
| Eukaryotic initiation factor 4A-I                                | 7                  | 2            | 0    | 0     | 1.51E-03          | 7.50E-04     | 0        | 0        |
| Macrophage-capping protein                                       | 7                  | 5            | 6    | 3     | 1.83E-03          | 2.27E-03     | 2.57E-03 | 3.30E-03 |
| Stress-induced-phosphoprotein 1                                  | 7                  | 2            | 0    | 0     | 1.11E-03          | 5.47E-04     | 0        | 0        |
| Protein-glutamine gamma-glutamyltransferase K                    | 7                  | 7            | 2    | 4     | 7.74E-04          | 1.34E-03     | 3.61E-04 | 1.86E-03 |
| Aldose reductase                                                 | 7                  | 6            | 0    | 0     | 1.93E-03          | 2.87E-03     | 0        | 0        |
| Elongation factor 2                                              | 7                  | 2            | 6    | 0     | 7.33E-04          | 3.63E-04     | 1.03E-03 | 0        |
| Alcohol dehydrogenase class-3                                    | 7                  | 2            | 0    | 0     | 1.74E-03          | 8.62E-04     | 0        | 0        |
| Calpain small subunit 1                                          | 7                  | 3            | 2    | 0     | 2.49E-03          | 1.85E-03     | 1.16E-03 | 0        |
| Ig gamma-2 chain C region                                        | 7                  | 6            | 8    | 0     | 1.93E-03          | 2.87E-03     | 3.61E-03 | 0        |
| Antithrombin-III                                                 | 7                  | 0            | 0    | 0     | 1.31E-03          | 0            | 0        | 0        |
| Chloride intracellular channel protein 4                         | 6                  | 0            | 0    | 0     | 2.06E-03          | 0            | 0        | 0        |
| Interleukin enhancer-binding factor 3                            | 6                  | 0            | 0    | 0     | 6.29E-04          | 0            | 0        | 0        |
| Protein-glutamine gamma-glutamyltransferase E                    | 6                  | 3            | 3    | 4     | 7.75E-04          | 6.72E-04     | 6.34E-04 | 2.17E-03 |
| Guanine nucleotide-binding protein G(I)/G(S)/G(T) subunit beta-1 | 6                  | 0            | 0    | 0     | 1.61E-03          | 0            | 0        | 0        |
| Ras-related protein Rab-11A                                      | 6                  | 0            | 0    | 0     | 2.49E-03          | 0            | 0        | 0        |
| Heterogeneous nuclear ribonucleoprotein K                        | 6                  | 3            | 4    | 0     | 1.17E-03          | 1.01E-03     | 1.28E-03 | 0        |
| F-actin-capping protein subunit alpha-1                          | 6                  | 0            | 4    | 0     | 1.81E-03          | 0            | 1.97E-03 | 0        |
| Lumican                                                          | 6                  | 6            | 0    | 4     | 1.57E-03          | 2.72E-03     | 0        | 4.40E-03 |
| F-actin-capping protein subunit alpha-2                          | 6                  | 0            | 2    | 0     | 1.81E-03          | 0            | 9.86E-04 | 0        |
| Heterogeneous nuclear ribonucleoprotein H                        | 6                  | 3            | 0    | 0     | 1.22E-03          | 1.06E-03     | 0        | 0        |
| Flavin reductase                                                 | 6                  | 0            | 0    | 0     | 2.71E-03          | 0            | 0        | 0        |
| Calreticulin                                                     | 6                  | 0            | 0    | 0     | 1.24E-03          | 0            | 0        | 0        |
| Thymidine phosphorylase                                          | 6                  | 0            | 0    | 0     | 1.19E-03          | 0            | 0        | 0        |
| Protein S100-A9                                                  | 6                  | 3            | 6    | 0     | 4.59E-03          | 3.98E-03     | 7.51E-03 | 0        |
| Myeloperoxidase                                                  | 6                  | 0            | 11   | 0     | 7.11E-04          | 0            | 2.13E-03 | 0        |
| Napsin-A                                                         | 6                  | 0            | 3    | 0     | 1.33E-03          | 0            | 1.08E-03 | 0        |
| WD repeat-containing protein 1                                   | 6                  | 0            | 2    | 0     | 9.05E-04          | 0            | 4.93E-04 | 0        |
| Glyoxylate reductase/hydroxypyruvate reductase                   | 5                  | 0            | 0    | 0     | 1.38E-03          | 0            | 0        | 0        |
| EH domain-containing protein 2                                   | 5                  | 2            | 0    | 0     | 8.16E-04          | 5.65E-04     | 0        | 0        |
| Sialic acid synthase                                             | 5                  | 0            | 0    | 0     | 1.24E-03          | 0            | 0        | 0        |
| Serpin B12                                                       | 5                  | 6            | 4    | 3     | 1.08E-03          | 2.25E-03     | 1.41E-03 | 2.72E-03 |
| Pulmonary surfactant-associated protein A2                       | 5                  | 8            | 6    | 12    | 1.91E-03          | 5.31E-03     | 3.75E-03 | 1.93E-02 |
| Inorganic pyrophosphatase                                        | 5                  | 0            | 0    | 0     | 1.51E-03          | 0            | 0        | 0        |
| Protein disulfide-isomerase A6                                   | 5                  | 2            | 6    | 6     | 1.04E-03          | 7.18E-04     | 2.03E-03 | 5.22E-03 |

| Identified Proteins                                      | Number of Peptides |              |      |       | Peptide abundance |              |          |          |
|----------------------------------------------------------|--------------------|--------------|------|-------|-------------------|--------------|----------|----------|
|                                                          | Triton X           | Deoxycholate | NaCl | DNase | Triton X          | Deoxycholate | NaCl     | DNase    |
| Septin-2                                                 | 5                  | 0            | 5    | 0     | 1.21E-03          | 0            | 1.98E-03 | 0        |
| Neutral alpha-glucosidase AB                             | 5                  | 0            | 4    | 0     | 4.65E-04          | 0            | 6.08E-04 | 0        |
| Heterogeneous nuclear ribonucleoprotein D0               | 5                  | 3            | 0    | 0     | 1.31E-03          | 1.36E-03     | 0        | 0        |
| Proteasome activator complex subunit 1                   | 5                  | 3            | 0    | 0     | 1.72E-03          | 1.78E-03     | 0        | 0        |
| ADP-ribosylation factor 3                                | 5                  | 0            | 0    | 0     | 2.37E-03          | 0            | 0        | 0        |
| Actin-related protein 2                                  | 5                  | 0            | 0    | 0     | 1.11E-03          | 0            | 0        | 0        |
| Proteasome subunit alpha type-6                          | 5                  | 5            | 4    | 0     | 1.84E-03          | 3.19E-03     | 2.41E-03 | 0        |
| Heterogeneous nuclear ribonucleoprotein F                | 5                  | 5            | 2    | 0     | 1.08E-03          | 1.87E-03     | 7.07E-04 | 0        |
| Serpin B9                                                | 5                  | 0            | 0    | 0     | 1.18E-03          | 0            | 0        | 0        |
| Ubiquitin-like modifier-activating enzyme 1              | 5                  | 0            | 6    | 3     | 4.22E-04          | 0            | 8.27E-04 | 1.06E-03 |
| Protein-glutamine gamma-glutamyltransferase 2            | 5                  | 0            | 5    | 0     | 6.46E-04          | 0            | 1.06E-03 | 0        |
| Annexin A7                                               | 5                  | 2            | 8    | 2     | 9.39E-04          | 6.51E-04     | 2.46E-03 | 1.58E-03 |
| Nucleolin                                                | 5                  | 5            | 3    | 4     | 6.46E-04          | 1.12E-03     | 6.34E-04 | 2.17E-03 |
| Thioredoxin                                              | 5                  | 4            | 2    | 4     | 4.15E-03          | 5.75E-03     | 2.71E-03 | 1.39E-02 |
| Histone H1.4                                             | 5                  | 0            | 0    | 0     | 2.26E-03          | 0            | 0        | 0        |
| Ig lambda-2 chain C regions                              | 5                  | 3            | 6    | 2     | 4.52E-03          | 4.70E-03     | 8.87E-03 | 7.59E-03 |
| Galectin-1                                               | 5                  | 7            | 4    | 0     | 3.32E-03          | 8.05E-03     | 4.34E-03 | 0        |
| Arginase-1                                               | 5                  | 7            | 3    | 0     | 1.42E-03          | 3.45E-03     | 1.39E-03 | 0        |
| Guanine nucleotide-binding protein G(i) subunit alpha-2  | 5                  | 0            | 0    | 0     | 1.24E-03          | 0            | 0        | 0        |
| Cystatin-B                                               | 5                  | 4            | 3    | 0     | 4.52E-03          | 6.27E-03     | 4.44E-03 | 0        |
| Alpha-1-acid glycoprotein 1                              | 5                  | 2            | 0    | 0     | 2.07E-03          | 1.44E-03     | 0        | 0        |
| HLA class I histocompatibility antigen, A-2 alpha chain  | 5                  | 0            | 0    | 2     | 1.21E-03          | 0            | 0        | 2.04E-03 |
| Ceruloplasmin                                            | 5                  | 2            | 0    | 3     | 4.08E-04          | 2.83E-04     | 0        | 1.03E-03 |
| Protein diaphanous homolog 1                             | 5                  | 0            | 0    | 0     | 3.53E-04          | 0            | 0        | 0        |
| Heterogeneous nuclear ribonucleoprotein Q                | 5                  | 8            | 5    | 0     | 7.11E-04          | 1.97E-03     | 1.16E-03 | 0        |
| Pyridoxal kinase                                         | 5                  | 0            | 0    | 0     | 1.42E-03          | 0            | 0        | 0        |
| Podocalyxin                                              | 5                  | 4            | 2    | 0     | 8.43E-04          | 1.17E-03     | 5.51E-04 | 0        |
| Synaptic vesicle membrane protein VAT-1 homolog          | 4                  | 0            | 2    | 0     | 9.48E-04          | 0            | 7.75E-04 | 0        |
| Gasdermin-A                                              | 4                  | 4            | 0    | 0     | 8.12E-04          | 1.41E-03     | 0        | 0        |
| Abhydrolase domain-containing protein 14B                | 4                  | 0            | 0    | 0     | 1.81E-03          | 0            | 0        | 0        |
| Fermitin family homolog 2                                | 4                  | 0            | 0    | 0     | 5.10E-04          | 0            | 0        | 0        |
| Thioredoxin domain-containing protein 5                  | 4                  | 0            | 2    | 0     | 8.29E-04          | 0            | 6.78E-04 | 0        |
| Advanced glycosylation end product-specific receptor     | 4                  | 4            | 4    | 0     | 9.26E-04          | 1.60E-03     | 1.51E-03 | 0        |
| Latent-transforming growth factor beta-binding protein 2 | 4                  | 14           | 4    | 0     | 2.04E-04          | 1.24E-03     | 3.34E-04 | 0        |
| Caldesmon                                                | 4                  | 5            | 0    | 6     | 4.28E-04          | 9.27E-04     | 0        | 2.69E-03 |
| Ras-related C3 botulinum toxin substrate 1               | 4                  | 0            | 0    | 0     | 1.90E-03          | 0            | 0        | 0        |
| GTP-binding nuclear protein Ran                          | 4                  | 0            | 0    | 0     | 1.66E-03          | 0            | 0        | 0        |
| Ras-related protein Rap-1b                               | 4                  | 0            | 0    | 0     | 1.90E-03          | 0            | 0        | 0        |

| Identified Proteins                                            | Number of Peptides |              |      |       | Peptide abundance |              |          |          |
|----------------------------------------------------------------|--------------------|--------------|------|-------|-------------------|--------------|----------|----------|
|                                                                | Triton X           | Deoxycholate | NaCl | DNase | Triton X          | Deoxycholate | NaCl     | DNase    |
| Ras-related protein Rab-14                                     | 4                  | 0            | 0    | 0     | 1.66E-03          | 0            | 0        | 0        |
| Cell division control protein 42 homolog                       | 4                  | 0            | 0    | 0     | 1.90E-03          | 0            | 0        | 0        |
| Microfibril-associated glycoprotein 4                          | 4                  | 2            | 0    | 0     | 1.37E-03          | 1.19E-03     | 0        | 0        |
| Rho GDP-dissociation inhibitor 2                               | 4                  | 3            | 2    | 0     | 1.73E-03          | 2.25E-03     | 1.41E-03 | 0        |
| Seryl-tRNA synthetase, cytoplasmic                             | 4                  | 0            | 0    | 0     | 6.75E-04          | 0            | 0        | 0        |
| Catenin beta-1                                                 | 4                  | 0            | 5    | 0     | 4.68E-04          | 0            | 9.57E-04 | 0        |
| Endoplasmic reticulum resident protein 29                      | 4                  | 3            | 3    | 0     | 1.37E-03          | 1.78E-03     | 1.68E-03 | 0        |
| Elongation factor 1-delta                                      | 4                  | 0            | 0    | 0     | 1.28E-03          | 0            | 0        | 0        |
| Serpin B3                                                      | 4                  | 0            | 0    | 0     | 8.85E-04          | 0            | 0        | 0        |
| Polypyrimidine tract-binding protein 1                         | 4                  | 2            | 0    | 0     | 6.98E-04          | 6.05E-04     | 0        | 0        |
| Proteasome subunit alpha type-4                                | 4                  | 3            | 2    | 0     | 1.37E-03          | 1.78E-03     | 1.12E-03 | 0        |
| Proteasome subunit alpha type-2                                | 4                  | 0            | 0    | 0     | 1.53E-03          | 0            | 0        | 0        |
| ATP synthase subunit alpha, mitochondrial                      | 4                  | 7            | 4    | 0     | 6.63E-04          | 2.01E-03     | 1.08E-03 | 0        |
| Peptidyl-prolyl cis-trans isomerase B                          | 4                  | 4            | 7    | 0     | 1.66E-03          | 2.87E-03     | 4.74E-03 | 0        |
| Fibulin-1                                                      | 4                  | 0            | 3    | 14    | 5.17E-04          | 0            | 6.34E-04 | 7.59E-03 |
| cAMP-dependent protein kinase type II-alpha regulatory subunit | 4                  | 0            | 0    | 0     | 8.65E-04          | 0            | 0        | 0        |
| Delta-aminolevulinic acid dehydratase                          | 4                  | 0            | 0    | 0     | 1.11E-03          | 0            | 0        | 0        |
| X-ray repair cross-complementing protein 5                     | 4                  | 0            | 0    | 0     | 4.80E-04          | 0            | 0        | 0        |
| X-ray repair cross-complementing protein 6                     | 4                  | 0            | 2    | 0     | 5.69E-04          | 0            | 4.65E-04 | 0        |
| Annexin A3                                                     | 4                  | 0            | 5    | 0     | 1.11E-03          | 0            | 2.26E-03 | 0        |
| Polyadenylate-binding protein 1                                | 4                  | 2            | 0    | 0     | 5.61E-04          | 4.86E-04     | 0        | 0        |
| Glycogen phosphorylase, brain form                             | 4                  | 0            | 0    | 0     | 4.10E-04          | 0            | 0        | 0        |
| Polyubiquitin-B                                                | 4                  | 2            | 2    | 3     | 1.53E-03          | 1.33E-03     | 1.25E-03 | 4.82E-03 |
| Annexin A4                                                     | 4                  | 0            | 8    | 0     | 1.11E-03          | 0            | 3.61E-03 | 0        |
| Carbonic anhydrase 3                                           | 4                  | 0            | 0    | 0     | 1.33E-03          | 0            | 0        | 0        |
| Protein S100-A6                                                | 4                  | 4            | 3    | 0     | 3.98E-03          | 6.90E-03     | 4.88E-03 | 0        |
| ATP synthase subunit beta, mitochondrial                       | 4                  | 6            | 6    | 0     | 6.98E-04          | 1.82E-03     | 1.71E-03 | 0        |
| Protein S100-A8                                                | 4                  | 4            | 6    | 2     | 3.62E-03          | 6.27E-03     | 8.87E-03 | 7.59E-03 |
| Superoxide dismutase [Mn], mitochondrial                       | 4                  | 5            | 4    | 3     | 1.59E-03          | 3.45E-03     | 2.60E-03 | 5.01E-03 |
| Complement component C9                                        | 4                  | 0            | 0    | 0     | 6.32E-04          | 0            | 0        | 0        |
| Cystatin-A                                                     | 4                  | 4            | 2    | 0     | 3.62E-03          | 6.27E-03     | 2.96E-03 | 0        |
| Complement factor B                                            | 4                  | 0            | 0    | 0     | 4.63E-04          | 0            | 0        | 0        |
| Purine nucleoside phosphorylase                                | 4                  | 3            | 3    | 0     | 1.24E-03          | 1.62E-03     | 1.52E-03 | 0        |
| Superoxide dismutase [Cu-Zn]                                   | 4                  | 3            | 0    | 5     | 2.49E-03          | 3.23E-03     | 0        | 1.30E-02 |
| Glutamate dehydrogenase 1, mitochondrial                       | 4                  | 4            | 9    | 0     | 6.53E-04          | 1.13E-03     | 2.40E-03 | 0        |
| N(G),N(G)-dimethylarginine dimethylaminohydrolase 2            | 4                  | 0            | 0    | 0     | 1.33E-03          | 0            | 0        | 0        |
| Heterogeneous nuclear ribonucleoprotein R                      | 4                  | 8            | 0    | 0     | 5.61E-04          | 1.94E-03     | 0        | 0        |

| Identified Proteins                                                     | Number of Peptides |              |      |       | Peptide abundance |              |          |          |
|-------------------------------------------------------------------------|--------------------|--------------|------|-------|-------------------|--------------|----------|----------|
|                                                                         | Triton X           | Deoxycholate | NaCl | DNase | Triton X          | Deoxycholate | NaCl     | DNase    |
| Proteasome subunit alpha type-7                                         | 4                  | 4            | 5    | 0     | 1.42E-03          | 2.46E-03     | 2.90E-03 | 0        |
| Coronin-1C                                                              | 3                  | 6            | 6    | 0     | 5.63E-04          | 1.95E-03     | 1.84E-03 | 0        |
| Aminopeptidase B                                                        | 3                  | 0            | 0    | 0     | 4.09E-04          | 0            | 0        | 0        |
| Coronin-1B                                                              | 3                  | 0            | 0    | 0     | 5.53E-04          | 0            | 0        | 0        |
| Aldose 1-epimerase                                                      | 3                  | 0            | 0    | 0     | 7.86E-04          | 0            | 0        | 0        |
| Lipoma-preferred partner                                                | 3                  | 0            | 0    | 0     | 4.52E-04          | 0            | 0        | 0        |
| Thioredoxin reductase 1, cytoplasmic                                    | 3                  | 0            | 0    | 0     | 4.20E-04          | 0            | 0        | 0        |
| Poly(rC)-binding protein 1                                              | 3                  | 0            | 2    | 0     | 8.07E-04          | 0            | 8.79E-04 | 0        |
| Coactosin-like protein                                                  | 3                  | 0            | 0    | 0     | 1.87E-03          | 0            | 0        | 0        |
| Bleomycin hydrolase                                                     | 3                  | 4            | 2    | 0     | 5.63E-04          | 1.30E-03     | 6.14E-04 | 0        |
| Four and a half LIM domains protein 1                                   | 3                  | 0            | 0    | 0     | 8.29E-04          | 0            | 0        | 0        |
| Acid ceramidase                                                         | 3                  | 0            | 4    | 0     | 6.63E-04          | 0            | 1.45E-03 | 0        |
| EGF-containing fibulin-like extracellular matrix protein 1              | 3                  | 0            | 4    | 0     | 5.43E-04          | 0            | 1.18E-03 | 0        |
| Desmocollin-1                                                           | 3                  | 5            | 4    | 2     | 2.99E-04          | 8.62E-04     | 6.51E-04 | 8.35E-04 |
| Caveolin-1                                                              | 3                  | 0            | 0    | 0     | 1.49E-03          | 0            | 0        | 0        |
| A-kinase anchor protein 12                                              | 3                  | 22           | 0    | 0     | 1.56E-04          | 1.99E-03     | 0        | 0        |
| Heterogeneous nuclear ribonucleoprotein U                               | 3                  | 2            | 2    | 0     | 3.28E-04          | 3.79E-04     | 3.57E-04 | 0        |
| Mucin-5AC (Fragments)                                                   | 3                  | 0            | 0    | 0     | 5.66E-05          | 0            | 0        | 0        |
| Serine/threonine-protein phosphatase 2A catalytic subunit alpha isoform | 3                  | 0            | 0    | 0     | 8.29E-04          | 0            | 0        | 0        |
| Actin-related protein 3                                                 | 3                  | 0            | 0    | 0     | 6.35E-04          | 0            | 0        | 0        |
| Destrin                                                                 | 3                  | 0            | 0    | 0     | 1.57E-03          | 0            | 0        | 0        |
| Myosin light polypeptide 6                                              | 3                  | 8            | 6    | 0     | 1.76E-03          | 8.11E-03     | 5.74E-03 | 0        |
| T-complex protein 1 subunit delta                                       | 3                  | 0            | 0    | 0     | 5.15E-04          | 0            | 0        | 0        |
| Hsc70-interacting protein                                               | 3                  | 2            | 2    | 0     | 7.28E-04          | 8.41E-04     | 7.93E-04 | 0        |
| Alpha-aminoadipic semialdehyde dehydrogenase                            | 3                  | 0            | 0    | 0     | 5.15E-04          | 0            | 0        | 0        |
| Platelet-activating factor acetylhydrolase IB subunit alpha             | 3                  | 0            | 0    | 0     | 6.35E-04          | 0            | 0        | 0        |
| Aldo-keto reductase family 1 member C3                                  | 3                  | 0            | 0    | 0     | 8.07E-04          | 0            | 0        | 0        |
| V-type proton ATPase catalytic subunit A                                | 3                  | 0            | 0    | 0     | 4.39E-04          | 0            | 0        | 0        |
| Protein S100-A11                                                        | 3                  | 3            | 3    | 2     | 2.49E-03          | 4.31E-03     | 4.07E-03 | 6.96E-03 |
| Coronin-1A                                                              | 3                  | 6            | 3    | 0     | 5.85E-04          | 2.03E-03     | 9.57E-04 | 0        |
| Proteasome subunit alpha type-5                                         | 3                  | 0            | 2    | 0     | 1.15E-03          | 0            | 1.25E-03 | 0        |
| Protein S100-A4                                                         | 3                  | 5            | 4    | 2     | 2.49E-03          | 7.18E-03     | 5.42E-03 | 6.96E-03 |
| Proteasome subunit alpha type-3                                         | 3                  | 2            | 2    | 0     | 1.07E-03          | 1.23E-03     | 1.16E-03 | 0        |
| Zinc-alpha-2-glycoprotein                                               | 3                  | 4            | 3    | 0     | 8.78E-04          | 2.03E-03     | 1.44E-03 | 0        |
| Adenosylhomocysteinase                                                  | 3                  | 0            | 2    | 0     | 6.22E-04          | 0            | 6.78E-04 | 0        |
| Small proline-rich protein 2E                                           | 3                  | 4            | 0    | 3     | 3.73E-03          | 8.62E-03     | 0        | 1.57E-02 |
| Mimecan                                                                 | 3                  | 0            | 0    | 0     | 8.78E-04          | 0            | 0        | 0        |
| Fatty acid-binding protein, adipocyte                                   | 3                  | 2            | 3    | 0     | 1.99E-03          | 2.30E-03     | 3.25E-03 | 0        |
| Farnesyl pyrophosphate synthase                                         | 3                  | 0            | 0    | 0     | 6.22E-04          | 0            | 0        | 0        |
| Translationally-controlled tumor protein                                | 3                  | 0            | 0    | 0     | 1.49E-03          | 0            | 0        | 0        |

| Identified Proteins                                        | Number of Peptides |              |      |       | Peptide abundance |              |          |          |
|------------------------------------------------------------|--------------------|--------------|------|-------|-------------------|--------------|----------|----------|
|                                                            | Triton X           | Deoxycholate | NaCl | DNase | Triton X          | Deoxycholate | NaCl     | DNase    |
| Protein disulfide-isomerase A4                             | 3                  | 0            | 3    | 0     | 4.09E-04          | 0            | 6.68E-04 | 0        |
| Prolactin-inducible protein                                | 3                  | 2            | 2    | 2     | 1.76E-03          | 2.03E-03     | 1.91E-03 | 4.91E-03 |
| Clusterin                                                  | 3                  | 0            | 0    | 3     | 5.74E-04          | 0            | 0        | 2.41E-03 |
| Putative heterogeneous nuclear ribonucleoprotein A1-like 3 | 3                  | 7            | 2    | 0     | 8.78E-04          | 3.55E-03     | 9.57E-04 | 0        |
| Complement C4-A                                            | 3                  | 0            | 3    | 0     | 1.55E-04          | 0            | 2.53E-04 | 0        |
| Histone H1.0                                               | 3                  | 2            | 4    | 0     | 1.42E-03          | 1.64E-03     | 3.10E-03 | 0        |
| Fatty acid-binding protein, heart                          | 3                  | 2            | 0    | 0     | 1.99E-03          | 2.30E-03     | 0        | 0        |
| Fructose-bisphosphate aldolase A                           | 3                  | 11           | 30   | 0     | 7.65E-04          | 4.86E-03     | 1.25E-02 | 0        |
| Angiotensinogen                                            | 3                  | 0            | 0    | 0     | 5.63E-04          | 0            | 0        | 0        |
| Adenylate kinase isoenzyme 1                               | 3                  | 0            | 0    | 0     | 1.36E-03          | 0            | 0        | 0        |
| NADH-cytochrome b5 reductase 3                             | 3                  | 0            | 0    | 0     | 8.78E-04          | 0            | 0        | 0        |
| N-acetyl-D-glucosamine kinase                              | 2                  | 0            | 0    | 0     | 5.38E-04          | 0            | 0        | 0        |
| Fibulin-5                                                  | 2                  | 0            | 0    | 3     | 3.98E-04          | 0            | 0        | 2.51E-03 |
| Methionine adenosyltransferase 2 subunit beta              | 2                  | 0            | 0    | 0     | 5.24E-04          | 0            | 0        | 0        |
| Alpha-parvin                                               | 2                  | 0            | 0    | 0     | 4.74E-04          | 0            | 0        | 0        |
| Protein S100-A14                                           | 2                  | 0            | 0    | 0     | 1.66E-03          | 0            | 0        | 0        |
| Mucin-5B                                                   | 2                  | 3            | 0    | 0     | 3.34E-05          | 8.68E-05     | 0        | 0        |
| Ester hydrolase C11orf54                                   | 2                  | 2            | 0    | 0     | 5.69E-04          | 9.85E-04     | 0        | 0        |
| Testis-expressed sequence 15 protein                       | 2                  | 0            | 0    | 0     | 6.32E-05          | 0            | 0        | 0        |
| Acetyl-CoA acetyltransferase, cytosolic                    | 2                  | 2            | 0    | 0     | 4.85E-04          | 8.41E-04     | 0        | 0        |
| Tubulin polymerization-promoting protein family member 3   | 2                  | 0            | 0    | 0     | 1.05E-03          | 0            | 0        | 0        |
| 3-hydroxybutyrate dehydrogenase type 2                     | 2                  | 0            | 0    | 0     | 7.37E-04          | 0            | 0        | 0        |
| Endoplasmic reticulum resident protein 44                  | 2                  | 0            | 3    | 0     | 4.23E-04          | 0            | 1.04E-03 | 0        |
| Cell division control protein 6 homolog                    | 2                  | 0            | 0    | 0     | 3.16E-04          | 0            | 0        | 0        |
| ERO1-like protein alpha                                    | 2                  | 0            | 0    | 0     | 3.69E-04          | 0            | 0        | 0        |
| BTB/POZ domain-containing protein KCTD12                   | 2                  | 2            | 0    | 0     | 5.53E-04          | 9.58E-04     | 0        | 0        |
| EF-hand domain-containing protein D2                       | 2                  | 0            | 0    | 0     | 7.37E-04          | 0            | 0        | 0        |
| Protein POF1B                                              | 2                  | 2            | 2    | 0     | 2.88E-04          | 5.00E-04     | 4.71E-04 | 0        |
| Programmed cell death 6-interacting protein                | 2                  | 0            | 0    | 0     | 2.07E-04          | 0            | 0        | 0        |
| Late cornified envelope protein 1D                         | 2                  | 0            | 0    | 0     | 1.81E-03          | 0            | 0        | 0        |
| Hsp90 co-chaperone Cdc37                                   | 2                  | 0            | 0    | 0     | 4.52E-04          | 0            | 0        | 0        |
| Zyxin                                                      | 2                  | 0            | 0    | 0     | 3.26E-04          | 0            | 0        | 0        |
| Serine/threonine-protein phosphatase 2A activator          | 2                  | 0            | 0    | 0     | 4.85E-04          | 0            | 0        | 0        |
| Inter-alpha-trypsin inhibitor heavy chain H4               | 2                  | 0            | 0    | 0     | 1.93E-04          | 0            | 0        | 0        |
| Calcyphosin                                                | 2                  | 2            | 0    | 0     | 9.48E-04          | 1.64E-03     | 0        | 0        |
| Plakophilin-1                                              | 2                  | 4            | 7    | 2     | 2.40E-04          | 8.31E-04     | 1.37E-03 | 1.01E-03 |
| Kinesin heavy chain isoform 5A                             | 2                  | 0            | 0    | 0     | 1.70E-04          | 0            | 0        | 0        |
| 1,4-alpha-glucan-branching enzyme                          | 2                  | 0            | 0    | 0     | 2.49E-04          | 0            | 0        | 0        |

| Identified Proteins                                                               | Number of Peptides |              |      |       | Peptide abundance |              |          |          |
|-----------------------------------------------------------------------------------|--------------------|--------------|------|-------|-------------------|--------------|----------|----------|
|                                                                                   | Triton X           | Deoxycholate | NaCl | DNase | Triton X          | Deoxycholate | NaCl     | DNase    |
| Receptor expression-enhancing protein 5                                           | 2                  | 0            | 0    | 0     | 9.48E-04          | 0            | 0        | 0        |
| Cytochrome c                                                                      | 2                  | 2            | 3    | 0     | 1.66E-03          | 2.87E-03     | 4.07E-03 | 0        |
| Dermcidin                                                                         | 2                  | 3            | 4    | 5     | 1.81E-03          | 4.70E-03     | 5.91E-03 | 1.90E-02 |
| Peptidyl-prolyl cis-trans isomerase FKBP1A                                        | 2                  | 3            | 0    | 0     | 1.66E-03          | 4.31E-03     | 0        | 0        |
| Epididymal secretory protein E1                                                   | 2                  | 0            | 0    | 0     | 1.17E-03          | 0            | 0        | 0        |
| 40S ribosomal protein S3a                                                         | 2                  | 0            | 0    | 0     | 6.63E-04          | 0            | 0        | 0        |
| Neutrophil defensin 1                                                             | 2                  | 2            | 2    | 2     | 1.99E-03          | 3.45E-03     | 3.25E-03 | 8.35E-03 |
| Puromycin-sensitive aminopeptidase                                                | 2                  | 0            | 0    | 0     | 1.93E-04          | 0            | 0        | 0        |
| Adenosine kinase                                                                  | 2                  | 0            | 0    | 0     | 4.85E-04          | 0            | 0        | 0        |
| Prolargin                                                                         | 2                  | 3            | 0    | 0     | 4.52E-04          | 1.18E-03     | 0        | 0        |
| Annexin A11                                                                       | 2                  | 0            | 9    | 0     | 3.69E-04          | 0            | 2.71E-03 | 0        |
| T-complex protein 1 subunit theta                                                 | 2                  | 0            | 0    | 0     | 3.32E-04          | 0            | 0        | 0        |
| Sulfotransferase 1A1                                                              | 2                  | 0            | 0    | 0     | 5.85E-04          | 0            | 0        | 0        |
| Proteasome subunit beta type-3                                                    | 2                  | 2            | 2    | 0     | 8.65E-04          | 1.50E-03     | 1.41E-03 | 0        |
| Alanyl-tRNA synthetase, cytoplasmic                                               | 2                  | 0            | 0    | 0     | 1.86E-04          | 0            | 0        | 0        |
| Prolyl endopeptidase                                                              | 2                  | 0            | 0    | 0     | 2.46E-04          | 0            | 0        | 0        |
| Glycogenin-1                                                                      | 2                  | 0            | 0    | 0     | 5.10E-04          | 0            | 0        | 0        |
| Adapter molecule crk                                                              | 2                  | 0            | 0    | 0     | 5.85E-04          | 0            | 0        | 0        |
| 3,2-trans-enoyl-CoA isomerase, mitochondrial                                      | 2                  | 2            | 2    | 0     | 6.03E-04          | 1.05E-03     | 9.86E-04 | 0        |
| Caspase-14                                                                        | 2                  | 3            | 0    | 2     | 7.11E-04          | 1.85E-03     | 0        | 2.98E-03 |
| S-adenosylmethionine synthase isoform type-2                                      | 2                  | 0            | 0    | 0     | 4.52E-04          | 0            | 0        | 0        |
| Serine/threonine-protein phosphatase 2A 65 kDa regulatory subunit A alpha isoform | 2                  | 0            | 0    | 0     | 3.06E-04          | 0            | 0        | 0        |
| Thioredoxin-dependent peroxide reductase, mitochondrial                           | 2                  | 4            | 3    | 0     | 7.11E-04          | 2.46E-03     | 1.74E-03 | 0        |
| Inositol monophosphatase 1                                                        | 2                  | 0            | 0    | 0     | 6.63E-04          | 0            | 0        | 0        |
| Proteasome subunit beta type-5                                                    | 2                  | 0            | 0    | 0     | 7.11E-04          | 0            | 0        | 0        |
| Proteasome subunit beta type-6                                                    | 2                  | 2            | 0    | 0     | 7.96E-04          | 1.38E-03     | 0        | 0        |
| 40S ribosomal protein S3                                                          | 2                  | 0            | 0    | 0     | 7.37E-04          | 0            | 0        | 0        |
| Inter-alpha-trypsin inhibitor heavy chain H2                                      | 2                  | 0            | 0    | 0     | 1.88E-04          | 0            | 0        | 0        |
| Aspartate aminotransferase, cytoplasmic                                           | 2                  | 0            | 0    | 0     | 4.33E-04          | 0            | 0        | 0        |
| Mucin-1                                                                           | 2                  | 2            | 2    | 3     | 1.63E-04          | 2.83E-04     | 2.67E-04 | 1.03E-03 |
| Nucleoside diphosphate kinase A                                                   | 2                  | 0            | 2    | 0     | 1.17E-03          | 0            | 1.91E-03 | 0        |
| Heterogeneous nuclear ribonucleoprotein L                                         | 2                  | 0            | 0    | 0     | 3.11E-04          | 0            | 0        | 0        |
| Macrophage migration inhibitory factor                                            | 2                  | 0            | 0    | 0     | 1.66E-03          | 0            | 0        | 0        |
| Xaa-Pro dipeptidase                                                               | 2                  | 4            | 0    | 0     | 3.62E-04          | 1.25E-03     | 0        | 0        |
| Uteroglobin                                                                       | 2                  | 0            | 0    | 0     | 1.99E-03          | 0            | 0        | 0        |
| cAMP-dependent protein kinase type I-alpha regulatory subunit                     | 2                  | 0            | 0    | 0     | 4.63E-04          | 0            | 0        | 0        |
| 60 kDa SS-A/Ro ribonucleoprotein                                                  | 2                  | 4            | 0    | 0     | 3.26E-04          | 1.13E-03     | 0        | 0        |

| Identified Proteins                                                | Number of Peptides |              |      |       | Peptide abundance |              |          |          |
|--------------------------------------------------------------------|--------------------|--------------|------|-------|-------------------|--------------|----------|----------|
|                                                                    | Triton X           | Deoxycholate | NaCl | DNase | Triton X          | Deoxycholate | NaCl     | DNase    |
| 40S ribosomal protein SA                                           | 2                  | 2            | 0    | 0     | 6.03E-04          | 1.05E-03     | 0        | 0        |
| Annexin A6 OS=Homo sapiens                                         | 2                  | 0            | 2    | 0     | 2.62E-04          | 0            | 4.28E-04 | 0        |
| Pulmonary surfactant-associated protein B                          | 2                  | 0            | 0    | 0     | 4.74E-04          | 0            | 0        | 0        |
| Cathepsin B                                                        | 2                  | 0            | 0    | 0     | 5.24E-04          | 0            | 0        | 0        |
| Creatine kinase M-type                                             | 2                  | 2            | 0    | 0     | 4.63E-04          | 8.02E-04     | 0        | 0        |
| Lupus La protein                                                   | 2                  | 2            | 0    | 0     | 4.23E-04          | 7.34E-04     | 0        | 0        |
| Fructose-bisphosphate aldolase B                                   | 2                  | 0            | 3    | 0     | 5.10E-04          | 0            | 1.25E-03 | 0        |
| Histidine-rich glycoprotein                                        | 2                  | 0            | 0    | 0     | 3.32E-04          | 0            | 0        | 0        |
| Transthyretin                                                      | 2                  | 0            | 0    | 0     | 1.24E-03          | 0            | 0        | 0        |
| Retinol-binding protein 4                                          | 2                  | 0            | 0    | 0     | 8.65E-04          | 0            | 0        | 0        |
| Kininogen-1                                                        | 2                  | 0            | 0    | 0     | 2.76E-04          | 0            | 0        | 0        |
| Argininosuccinate synthase 3'(2'),5'-bisphosphate nucleotidase 1   | 2                  | 2            | 0    | 0     | 4.23E-04          | 7.34E-04     | 0        | 0        |
| Serum deprivation-response protein                                 | 2                  | 0            | 0    | 0     | 6.03E-04          | 0            | 0        | 0        |
| N(G),N(G)-dimethylarginine dimethylaminohydrolase 1                | 2                  | 0            | 0    | 0     | 4.23E-04          | 0            | 0        | 0        |
| Acyl-protein thioesterase 1                                        | 2                  | 3            | 2    | 0     | 6.42E-04          | 1.67E-03     | 1.05E-03 | 0        |
| Aflatoxin B1 aldehyde reductase member 2                           | 2                  | 0            | 0    | 0     | 7.96E-04          | 0            | 0        | 0        |
| Putative pre-mRNA-splicing factor ATP-dependent RNA helicase DHX15 | 2                  | 0            | 0    | 0     | 4.98E-04          | 0            | 0        | 0        |
| Actin-related protein 2/3 complex subunit 3                        | 2                  | 0            | 0    | 0     | 2.19E-04          | 0            | 0        | 0        |
| Actin-related protein 2/3 complex subunit 2                        | 2                  | 0            | 0    | 0     | 9.48E-04          | 0            | 0        | 0        |
| Late cornified envelope protein 2B                                 | 2                  | 0            | 0    | 0     | 5.85E-04          | 0            | 0        | 0        |
| Zinc finger protein 734                                            | 2                  | 3            | 0    | 0     | 1.81E-03          | 4.70E-03     | 0        | 0        |
| EMILIN-1                                                           | 2                  | 0            | 0    | 0     | 3.06E-04          | 0            | 0        | 0        |
| Proliferation-associated protein 2G4                               | 0                  | 0            | 0    | 7     | 0                 | 0            | 0        | 2.73E-03 |
| Coiled-coil domain-containing protein 19, mitochondrial            | 0                  | 3            | 3    | 0     | 0                 | 1.18E-03     | 1.11E-03 | 0        |
| Prenylcysteine oxidase 1                                           | 0                  | 2            | 0    | 0     | 0                 | 5.23E-04     | 0        | 0        |
| Ribosome-binding protein 1                                         | 0                  | 0            | 2    | 0     | 0                 | 0            | 5.71E-04 | 0        |
| Calmodulin-like protein 5                                          | 0                  | 0            | 0    | 2     | 0                 | 0            | 0        | 5.49E-04 |
| Septin-11                                                          | 0                  | 3            | 8    | 0     | 0                 | 3.23E-03     | 8.13E-03 | 0        |
| Aconitate hydratase, mitochondrial                                 | 0                  | 2            | 3    | 0     | 0                 | 7.04E-04     | 9.96E-04 | 0        |
| Collagen alpha-1(XII) chain                                        | 0                  | 0            | 2    | 0     | 0                 | 0            | 3.83E-04 | 0        |
| Leucine-rich repeat-containing protein 15                          | 0                  | 0            | 2    | 0     | 0                 | 0            | 9.77E-05 | 0        |
| Target of Nesh-SH3                                                 | 0                  | 0            | 19   | 0     | 0                 | 0            | 4.83E-03 | 0        |
| Membrane primary amine oxidase                                     | 0                  | 3            | 0    | 0     | 0                 | 4.35E-04     | 0        | 0        |
| Hydroxyacyl-coenzyme A dehydrogenase, mitochondrial                | 0                  | 0            | 5    | 2     | 0                 | 0            | 9.57E-04 | 9.82E-04 |
| 2,4-dienoyl-CoA reductase, mitochondrial                           | 0                  | 2            | 3    | 0     | 0                 | 1.01E-03     | 1.44E-03 | 0        |
| Laminin subunit alpha-4                                            | 0                  | 2            | 5    | 0     | 0                 | 9.58E-04     | 2.26E-03 | 0        |
| Transforming growth factor-beta-induced protein ig-h3              | 0                  | 6            | 6    | 0     | 0                 | 5.10E-04     | 4.81E-04 | 0        |
|                                                                    | 0                  | 0            | 3    | 0     | 0                 | 0            | 6.51E-04 | 0        |

| Identified Proteins                                                                                              | Number of Peptides |              |      |       | Peptide abundance |              |          |          |
|------------------------------------------------------------------------------------------------------------------|--------------------|--------------|------|-------|-------------------|--------------|----------|----------|
|                                                                                                                  | Triton X           | Deoxycholate | NaCl | DNase | Triton X          | Deoxycholate | NaCl     | DNase    |
| Phosphoglucomutase-like protein 5                                                                                | 0                  | 0            | 2    | 0     | 0                 | 0            | 5.25E-04 | 0        |
| Periostin                                                                                                        | 0                  | 0            | 3    | 0     | 0                 | 0            | 5.25E-04 | 0        |
| Latent-transforming growth factor beta-binding protein 1                                                         | 0                  | 0            | 0    | 10    | 0                 | 0            | 0        | 2.23E-03 |
| Major vault protein                                                                                              | 0                  | 0            | 7    | 2     | 0                 | 0            | 1.15E-03 | 8.44E-04 |
| Filamin-C                                                                                                        | 0                  | 0            | 0    | 37    | 0                 | 0            | 0        | 5.31E-03 |
| Collagen alpha-1(XIV) chain                                                                                      | 0                  | 0            | 9    | 0     | 0                 | 0            | 7.55E-04 | 0        |
| Lamin-B2                                                                                                         | 0                  | 9            | 4    | 4     | 0                 | 2.28E-03     | 9.57E-04 | 2.46E-03 |
| 2-oxoglutarate dehydrogenase, mitochondrial                                                                      | 0                  | 0            | 2    | 0     | 0                 | 0            | 2.80E-04 | 0        |
| Neutrophil gelatinase-associated lipocalin                                                                       | 0                  | 4            | 0    | 0     | 0                 | 3.00E-03     | 0        | 0        |
| 60S ribosomal protein L11                                                                                        | 0                  | 2            | 0    | 0     | 0                 | 1.72E-03     | 0        | 0        |
| Small nuclear ribonucleoprotein Sm D3                                                                            | 0                  | 2            | 2    | 0     | 0                 | 2.46E-03     | 2.32E-03 | 0        |
| Calmodulin                                                                                                       | 0                  | 3            | 0    | 0     | 0                 | 3.04E-03     | 0        | 0        |
| Lysozyme C                                                                                                       | 0                  | 2            | 6    | 0     | 0                 | 2.03E-03     | 5.74E-03 | 0        |
| 10 kDa heat shock protein, mitochondrial                                                                         | 0                  | 2            | 0    | 0     | 0                 | 3.14E-03     | 0        | 0        |
| Cadherin-13                                                                                                      | 0                  | 0            | 0    | 2     | 0                 | 0            | 0        | 1.07E-03 |
| Adenylate kinase 2, mitochondrial                                                                                | 0                  | 2            | 0    | 0     | 0                 | 1.33E-03     | 0        | 0        |
| Heterogeneous nuclear ribonucleoprotein A3                                                                       | 0                  | 4            | 0    | 0     | 0                 | 1.72E-03     | 0        | 0        |
| Peroxisomal multifunctional enzyme type 2                                                                        | 0                  | 0            | 3    | 0     | 0                 | 0            | 6.10E-04 | 0        |
| Basal cell adhesion molecule                                                                                     | 0                  | 0            | 3    | 3     | 0                 | 0            | 7.28E-04 | 1.87E-03 |
| Very long-chain specific acyl-CoA dehydrogenase, mitochondrial                                                   | 0                  | 0            | 3    | 0     | 0                 | 0            | 6.97E-04 | 0        |
| Nestin                                                                                                           | 0                  | 6            | 3    | 0     | 0                 | 5.85E-04     | 2.76E-04 | 0        |
| Glutathione synthetase                                                                                           | 0                  | 0            | 2    | 0     | 0                 | 0            | 6.26E-04 | 0        |
| Galectin-7                                                                                                       | 0                  | 3            | 6    | 0     | 0                 | 3.45E-03     | 6.51E-03 | 0        |
| Histidine ammonia-lyase                                                                                          | 0                  | 2            | 0    | 0     | 0                 | 4.72E-04     | 0        | 0        |
| Trifunctional enzyme subunit alpha, mitochondrial                                                                | 0                  | 0            | 10   | 0     | 0                 | 0            | 1.96E-03 | 0        |
| Collagen alpha-1(XVIII) chain                                                                                    | 0                  | 2            | 5    | 0     | 0                 | 1.94E-04     | 4.57E-04 | 0        |
| Collagen alpha-1(XV) chain                                                                                       | 0                  | 0            | 2    | 0     | 0                 | 0            | 2.29E-04 | 0        |
| Dihydrolipoyllysine-residue succinyltransferase component of 2-oxoglutarate dehydrogenase complex, mitochondrial | 0                  | 4            | 3    | 0     | 0                 | 1.41E-03     | 9.96E-04 | 0        |
| Fibrillin-1                                                                                                      | 0                  | 0            | 0    | 69    | 0                 | 0            | 0        | 9.23E-03 |
| Long-chain-fatty-acid--CoA ligase 1                                                                              | 0                  | 0            | 2    | 0     | 0                 | 0            | 4.17E-04 | 0        |
| Carbamoyl-phosphate synthase [ammonia], mitochondrial                                                            | 0                  | 5            | 2    | 0     | 0                 | 5.23E-04     | 1.97E-04 | 0        |
| HLA class I histocompatibility antigen, B-13 alpha chain                                                         | 0                  | 0            | 2    | 0     | 0                 | 0            | 8.13E-04 | 0        |
| 60S ribosomal protein L12                                                                                        | 0                  | 0            | 2    | 0     | 0                 | 0            | 1.81E-03 | 0        |
| Calmodulin-like protein 3                                                                                        | 0                  | 0            | 2    | 0     | 0                 | 0            | 1.91E-03 | 0        |
| Myosin regulatory light polypeptide 9                                                                            | 0                  | 2            | 0    | 0     | 0                 | 1.72E-03     | 0        | 0        |
| Myeloblastin                                                                                                     | 0                  | 0            | 2    | 0     | 0                 | 0            | 1.16E-03 | 0        |



| Identified Proteins                                 | Number of Peptides |              |      |       | Peptide abundance |              |          |          |
|-----------------------------------------------------|--------------------|--------------|------|-------|-------------------|--------------|----------|----------|
|                                                     | Triton X           | Deoxycholate | NaCl | DNase | Triton X          | Deoxycholate | NaCl     | DNase    |
| Heterogeneous nuclear ribonucleoproteins A2/B1      | 0                  | 8            | 0    | 0     | 0                 | 3.73E-03     | 0        | 0        |
| Non-specific lipid-transfer protein                 | 0                  | 2            | 0    | 0     | 0                 | 5.85E-04     | 0        | 0        |
| Tenascin-X                                          | 0                  | 2            | 16   | 6     | 0                 | 7.43E-05     | 5.61E-04 | 5.40E-04 |
| Biglycan                                            | 0                  | 6            | 4    | 0     | 0                 | 2.46E-03     | 1.55E-03 | 0        |
| Voltage-dependent anion-selective channel protein 1 | 0                  | 0            | 2    | 0     | 0                 | 0            | 1.05E-03 | 0        |
| Lamin-B1                                            | 0                  | 6            | 2    | 0     | 0                 | 1.57E-03     | 4.93E-04 | 0        |
| Tryptase beta-2                                     | 0                  | 2            | 5    | 0     | 0                 | 1.11E-03     | 2.62E-03 | 0        |
| NADPH--cytochrome P450 reductase                    | 0                  | 0            | 2    | 0     | 0                 | 0            | 4.22E-04 | 0        |
| Aggrecan core protein                               | 0                  | 3            | 3    | 2     | 0                 | 2.07E-04     | 1.95E-04 | 3.34E-04 |
| CD44 antigen                                        | 0                  | 0            | 2    | 0     | 0                 | 0            | 3.97E-04 | 0        |
| Pyruvate kinase isozymes M1/M2                      | 0                  | 4            | 7    | 0     | 0                 | 1.19E-03     | 1.96E-03 | 0        |
| Nidogen-1                                           | 0                  | 0            | 0    | 14    | 0                 | 0            | 0        | 4.30E-03 |
| Glucosidase 2 subunit beta                          | 0                  | 2            | 2    | 0     | 0                 | 5.85E-04     | 5.51E-04 | 0        |
| Versican core protein                               | 0                  | 2            | 3    | 0     | 0                 | 9.25E-05     | 1.31E-04 | 0        |
| Nucleoprotein TPR                                   | 0                  | 0            | 3    | 0     | 0                 | 0            | 1.83E-04 | 0        |
| Collagen alpha-3(VI) chain                          | 0                  | 7            | 58   | 43    | 0                 | 3.51E-04     | 2.74E-03 | 5.22E-03 |
| Laminin subunit gamma-1                             | 0                  | 13           | 11   | 21    | 0                 | 1.26E-03     | 1.01E-03 | 4.93E-03 |
| Lysosomal alpha-glucosidase                         | 0                  | 3            | 0    | 0     | 0                 | 4.93E-04     | 0        | 0        |
| Fructose-bisphosphate aldolase C                    | 0                  | 0            | 7    | 0     | 0                 | 0            | 2.92E-03 | 0        |
| Dihydrolipoyl dehydrogenase, mitochondrial          | 0                  | 6            | 4    | 0     | 0                 | 1.92E-03     | 1.20E-03 | 0        |
| Dihydropteridine reductase                          | 0                  | 3            | 0    | 0     | 0                 | 1.99E-03     | 0        | 0        |
| Collagen alpha-2(IV) chain                          | 0                  | 0            | 0    | 6     | 0                 | 0            | 0        | 1.49E-03 |
| Complement decay-accelerating factor                | 0                  | 0            | 0    | 2     | 0                 | 0            | 0        | 2.04E-03 |
| Laminin subunit beta-1                              | 0                  | 3            | 4    | 0     | 0                 | 2.61E-04     | 3.29E-04 | 0        |
| Decorin                                             | 0                  | 4            | 9    | 0     | 0                 | 1.72E-03     | 3.66E-03 | 0        |
| Trypsin-1                                           | 0                  | 0            | 2    | 2     | 0                 | 0            | 1.20E-03 | 3.09E-03 |
| Acyl-CoA-binding protein                            | 0                  | 2            | 0    | 0     | 0                 | 3.45E-03     | 0        | 0        |
| Epoxide hydrolase 1                                 | 0                  | 0            | 2    | 0     | 0                 | 0            | 6.14E-04 | 0        |
| 60S acidic ribosomal protein P0                     | 0                  | 2            | 0    | 0     | 0                 | 1.01E-03     | 0        | 0        |
| Alpha-1B-glycoprotein                               | 0                  | 0            | 0    | 2     | 0                 | 0            | 0        | 1.55E-03 |
| Fibronectin                                         | 0                  | 0            | 10   | 20    | 0                 | 0            | 6.18E-04 | 3.18E-03 |
| Beta-2-glycoprotein 1                               | 0                  | 0            | 2    | 0     | 0                 | 0            | 8.56E-04 | 0        |
| Prelamin-A/C                                        | 0                  | 27           | 46   | 6     | 0                 | 6.29E-03     | 1.01E-02 | 3.39E-03 |
| Ig gamma-3 chain C region                           | 0                  | 0            | 8    | 0     | 0                 | 0            | 3.17E-03 | 0        |
| Aspartate aminotransferase, mitochondrial           | 0                  | 9            | 10   | 0     | 0                 | 3.23E-03     | 3.39E-03 | 0        |
| Peptidoglycan recognition protein 1                 | 0                  | 0            | 0    | 3     | 0                 | 0            | 0        | 5.69E-03 |
| Citrate synthase, mitochondrial                     | 0                  | 0            | 3    | 0     | 0                 | 0            | 9.38E-04 | 0        |
| Protein CutA                                        | 0                  | 0            | 0    | 2     | 0                 | 0            | 0        | 4.40E-03 |
| Periplakin                                          | 0                  | 2            | 4    | 0     | 0                 | 1.68E-04     | 3.17E-04 | 0        |
| Laminin subunit alpha-5                             | 0                  | 0            | 0    | 5     | 0                 | 0            | 0        | 5.22E-04 |
| Agrin                                               | 0                  | 37           | 74   | 15    | 0                 | 2.97E-03     | 5.60E-03 | 2.91E-03 |
| Putative high mobility group protein B1-like 1      | 0                  | 2            | 0    | 0     | 0                 | 1.44E-03     | 0        | 0        |

**Table E2.** Relative abundance of matrisome-associated proteins in decellularized lung matrix (DLM) compared to paired native lung (LUNG). By mass spectrometry. In general, DLM was highly enriched for most structural proteins. Very few proteins were lower in abundance following decellularization.

| <b>Identified Proteins</b>                                 | <b>Fold Change<br/>(DLM/LUNG)</b> |
|------------------------------------------------------------|-----------------------------------|
| Microfibrillar-associated protein 2                        | 18.99                             |
| Metalloproteinase inhibitor 3                              | 17.29                             |
| Asporin                                                    | 16.16                             |
| Microfibrillar-associated protein 5                        | 15.42                             |
| Collagen alpha-1(VII) chain                                | 14.68                             |
| Collagen alpha-6(VI) chain                                 | 9.93                              |
| Dermatopontin                                              | 8.94                              |
| Collagen alpha-1(VI) chain                                 | 7.31                              |
| Fibrillin-1                                                | 7.07                              |
| Collagen alpha-2(VI) chain                                 | 5.84                              |
| Nephronectin                                               | 5.52                              |
| Laminin subunit alpha-5                                    | 5.32                              |
| Collagen alpha-2(IV) chain                                 | 4.95                              |
| Transforming growth factor-beta-induced protein ig-h3      | 4.57                              |
| Mimecan                                                    | 4.21                              |
| Collagen alpha-1(IV) chain                                 | 3.80                              |
| Fibulin-5                                                  | 3.56                              |
| EGF-containing fibulin-like extracellular matrix protein 1 | 3.55                              |
| Laminin subunit beta-2                                     | 3.53                              |
| Protein AMBP                                               | 2.82                              |
| Collagen alpha-3(VI) chain                                 | 2.52                              |
| Fibrinogen beta chain                                      | 2.48                              |
| Fibromodulin                                               | 2.29                              |
| Nidogen-1                                                  | 2.12                              |
| Laminin subunit gamma-1                                    | 2.04                              |
| Collagen alpha-1(III) chain                                | 1.98                              |
| EMILIN-1                                                   | 1.97                              |
| Microfibril-associated glycoprotein 4                      | 1.96                              |
| Fibulin-2                                                  | 1.76                              |
| Tenascin                                                   | 1.72                              |
| Vitronectin                                                | 1.65                              |
| Fibrinogen gamma chain                                     | 1.52                              |
| Fibrinogen alpha chain                                     | 1.50                              |
| Nidogen-2                                                  | 1.39                              |
| Collagen alpha-2(I) chain                                  | 1.37                              |
| Aggrecan core protein                                      | 1.37                              |
| Collagen alpha-1(XII) chain                                | 1.32                              |
| Decorin                                                    | 1.30                              |
| Periostin                                                  | 1.29                              |
| Laminin subunit alpha-4                                    | 1.12                              |

|                                                                      |      |
|----------------------------------------------------------------------|------|
| Annexin A7                                                           | 1.09 |
| Basement membrane-specific heparan sulfate proteoglycan core protein | 1.08 |
| Laminin subunit beta-1                                               | 0.98 |
| Versican core protein                                                | 0.90 |
| Collagen alpha-1(I) chain                                            | 0.88 |
| Fibronectin                                                          | 0.78 |
| Hyaluronan and proteoglycan link protein 1                           | 0.77 |
| Deleted in malignant brain tumors 1 protein                          | 0.61 |
| Annexin A6                                                           | 0.60 |
| Biglycan                                                             | 0.57 |
| Annexin A2                                                           | 0.55 |
| Prolargin                                                            | 0.53 |
| Fibulin-1                                                            | 0.53 |
| Collagen alpha-1(XIV) chain                                          | 0.51 |
| Annexin A11                                                          | 0.47 |
| Alpha-1-antichymotrypsin                                             | 0.45 |
| Annexin A4                                                           | 0.40 |
| Latent-transforming growth factor beta-binding protein 4             | 0.39 |
| Collagen alpha-1(XVIII) chain                                        | 0.38 |
| Matrix metalloproteinase-9                                           | 0.33 |
| Annexin A5                                                           | 0.31 |
| Thrombospondin-1                                                     | 0.30 |
| Inter-alpha-trypsin inhibitor heavy chain H4                         | 0.29 |
| Neutrophil elastase                                                  | 0.27 |
| Leukocyte elastase inhibitor                                         | 0.26 |
| Tenascin-X                                                           | 0.23 |
| Lumican                                                              | 0.22 |
| Alpha-1-antitrypsin                                                  | 0.22 |
| Collagen alpha-1(XV) chain                                           | 0.16 |
| Laminin subunit alpha-2                                              | 0.15 |
| Annexin A1                                                           | 0.08 |
| Agrin                                                                | 0.07 |
| Inter-alpha-trypsin inhibitor heavy chain H2                         | 0.04 |
| Latent-transforming growth factor beta-binding protein 2             | 0.03 |
| Elastin                                                              | -    |
| Matrix metalloproteinase-23                                          | -    |
| Matrix Gla protein                                                   | -    |
| EGF-containing fibulin-like extracellular matrix protein 2           | -    |
| Collagen alpha-1(VIII) chain                                         | -    |
| Plasminogen                                                          | -    |
| Fibrillin-2                                                          | -    |
| Collagen alpha-1(X) chain                                            | -    |
| Laminin subunit beta-3                                               | -    |

|                                                                |      |
|----------------------------------------------------------------|------|
| Laminin subunit gamma-2                                        | -    |
| Extracellular matrix protein 1                                 | -    |
| Laminin subunit alpha-3                                        | -    |
| Latent-transforming growth factor beta-binding protein 1       | -    |
| Tubulointerstitial nephritis antigen-like                      | -    |
| Collagen alpha-5(VI) chain                                     | -    |
| Disintegrin and metalloproteinase domain-containing protein 10 | 0.00 |
| Metalloproteinase inhibitor 1                                  | 0.00 |
| Collagen alpha-1(II) chain                                     | 0.00 |
| Annexin A3                                                     | 0.00 |
| Inter-alpha-trypsin inhibitor heavy chain H1                   | 0.00 |
| Cartilage matrix protein                                       | 0.00 |
| Serpin H1                                                      | 0.00 |
| SPARC-like protein 1                                           | 0.00 |
| Chondroitin sulfate proteoglycan 4                             | 0.00 |

---

**Figure E1.**

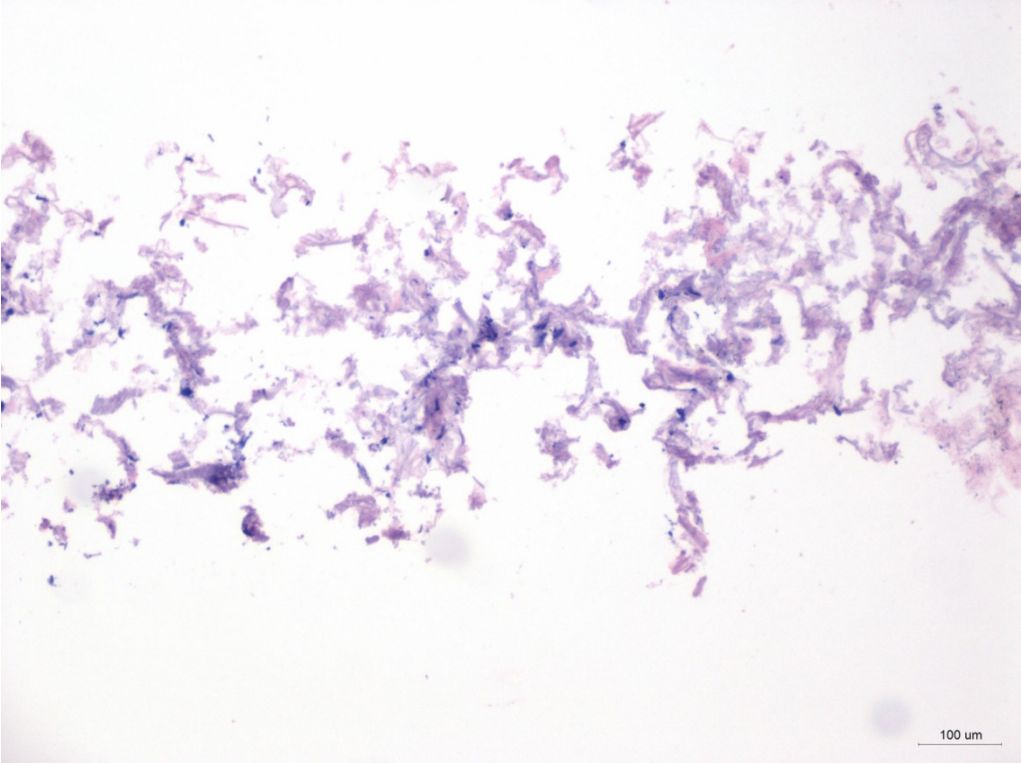

## **SUPPLEMENTAL FIGURE LEGEND**

**Figure E1.** H&E stained vertical section of an acellular lung matrix slice 48 hours after fibroblast seeding. Hematoxylin-stained nuclei can be seen in the center portion of the slice, indicating the fibroblasts migrated through the matrix. 10x magnification.

## **REFERENCES**

- E1. Levy R, Maaloum M. Specific molecular interactions by force spectroscopy: From single bonds to collective properties. *Biophys Chem* 2005;117:233-237.
- E2. Butler JP, Nakamura M, Sasaki H, Sasaki T, Takishima T. Poissons' ratio of lung parenchyma and parenchymal interaction with bronchi. *Jpn J Physiol* 1986;36:91-106.
